# Supplementary material for: Serum YKL-40 as a marker of liver fibrosis in patients with non-alcoholic fatty liver disease
Source: PubMed Central journal article supplement (PMC5064386; doi:10.1038/srep35282), 2016-10-14

## Supplementary Information

### **Serum YKL-40 as a marker of liver fibrosis in patients with non-alcoholic fatty liver disease**

Erina Kumagai<sup>1,2,#</sup>, Yohei Mano<sup>1,#</sup>, Sachiyo Yoshio<sup>1</sup>, Hirotaka Shoji<sup>1</sup>, Masaya Sugiyama<sup>1</sup>, Masaaki Korenaga<sup>1</sup>, Tsuyoshi Ishida<sup>3</sup>, Taeang Arai<sup>4</sup>, Norio Itokawa<sup>4</sup>, Masanori Atsukawa<sup>4</sup>, Hideyuki Hyogo<sup>5,6</sup>, Kazuaki Chayama<sup>5</sup>, Tomohiko Ohashi<sup>7</sup>, Kiyooki Ito<sup>7</sup>, Masashi Yoneda<sup>7</sup>, Takumi Kawaguchi<sup>8</sup>, Takuji Torimura<sup>8</sup>, Yuichi Nozaki<sup>9</sup>, Sumio Watanabe<sup>2</sup>, Masashi Mizokami<sup>1</sup> and Tatsuya Kanto<sup>1</sup>

1 The Research Center for Hepatitis and Immunology, National Center for Global Health and Medicine, Ichikawa, Japan.

2 Department of Gastroenterology, Juntendo University School of Medicine, Hongo, Bunkyo, Tokyo, Japan.

3 Department of Pathology and Laboratory Medicine, Kohnodai Hospital, National Center for Global Health and Medicine, Ichikawa, Japan.

4 Division of Gastroenterology, Department of Internal Medicine, Nippon Medical

School Chiba Hokusoh Hospital, Inzai, Japan.

5 Department of Gastroenterology and Metabolism, Hiroshima University, Hiroshima, Japan.

6 Department of Gastroenterology and Hepatology, JA Hiroshima General Hospital, Hiroshima, Japan.

7 Division of Gastroenterology, Department of Internal Medicine, Aichi Medical University School of Medicine, Nagakute, Japan.

8 Division of Gastroenterology, Department of Medicine, Kurume University School of Medicine, Kurume, Japan.

9 Department of Gastroenterology, National Center for Global Health and Medicine, Central Hospital, Tokyo, Japan.

# Erina Kumagai and Yohei Mano contributed equally to this work.

**Corresponding author:** Tatsuya Kanto, M.D., Ph.D.

The Research Center for Hepatitis and Immunology, National Center for Global Health and Medicine, 1-7-1, Kohnodai, Ichikawa 272-8516, Japan.

E-mail: kantot@hospk.ncgm.go.jp

Telephone: +81-47-372-3501, Fax: +81-47-375-4766

Supplementary Table S1. NAFLD Activity Score (NAS) and Background of Patients in Each Stage of Fibrosis

| NAS                                           | Stage 0-1 (n = 12) | Stage 2 (n= 21)  | Stage3 (n = 23)  | Stage4 (n=9)      |
|-----------------------------------------------|--------------------|------------------|------------------|-------------------|
| Male/Female                                   | 4/8                | 8/13             | 7/16             | 4/5               |
| Age (year)                                    | 61 (32-74)         | 59 (22-81)       | 61 (31-79)       | 67 (56-80)        |
| BMI (kg/m <sup>2</sup> )                      | 28.6 (22.8-30.4)   | 28.6 (20.8-35.4) | 28.2 (24.7-33.2) | 27.2 (20.1-29.4)  |
| Platelet (x10 <sup>4</sup> /mm <sup>3</sup> ) | 20.3 (13.7-26.8)   | 23.2 (13.4-40.5) | 21.0 (11.9-30.5) | 12.0 (3.9-25.1)   |
| Albumin (g/dL)                                | 4.6 (4.1-4.8)      | 4.5 (3.9-5.4)    | 4.4 (3.5-4.9)    | 3.8 (2.6-4.6)     |
| Total bilirubin (mg/dl)                       | 0.7 (0.4-1.6)      | 0.8 (0.3-2.4)    | 0.9 (0.4-2.4)    | 1.3 (0.3-2.5)     |
| AST (IU/U)                                    | 32 (19-45)         | 54(17-245)       | 80 (31-186)      | 52 (27-120)       |
| ALT (IU/L)                                    | 56 (14-102)        | 96 (12-539)      | 116 (43-318)     | 50 (14-138)       |
| Type IV collagen 7s (ng/ml)                   | 4.2 (3.2-5.2)      | 5.0 (2.7-8.1)    | 6.1 (3.8-8.9)    | 7.7 (6.7-8.6)     |
| Hyaluronic acid (ng/ml)                       | 43 (12-92)         | 115 (12-751)     | 82 (13-231)      | 192 (29-451)      |
| APRI                                          | 0.50 (0.27-0.91)   | 0.72 (0.25-2.86) | 1.24 (0.58-3.41) | 1.69 (0.44-3.57)  |
| FIB-4 index                                   | 1.52(0.46-3.24)    | 1.53 (0.55-3.08) | 2.44 (0.70-3.94) | 6.57 (1.36-15.89) |
| Steatosis (0/1/2/3)                           | 1/2/3/6            | 0/8/5/8          | 0/11/7/5         | 1/4/3/1           |
| Hepatocyte Balloning (0/1/2)                  | 3/9/0              | 1/11/9           | 0/10/13          | 0/5/4             |
| Lobular Inflammation (0/1/2/3)                | 0/9/3/0            | 0/13/7/1         | 0/9/12/2         | 1/4/3/1           |

Supplementary Table S2. Clinical Background of Chronic Hepatitis for HCV Patients in Each Stage of Fibrosis

| Chronic hepatitis with HCV             |                    |                  |                  |                  |                   |
|----------------------------------------|--------------------|------------------|------------------|------------------|-------------------|
|                                        | Stage 0-1 (n = 18) | Stage 2 (n= 12)  | Stage3 (n = 3)   | Stage4 (n=15)    | HCC (n=31)        |
| Male/Female                            | 9/9                | 7/5              | 1/2              | 4/11             | 19/12             |
| Age (year)                             | 52 (18-27)         | 65 (49-74)       | 65 (54-76)       | 67 (46-89)       | 72 (58-85)        |
| Platelet ( $\times 10^4/\text{mm}^3$ ) | 18.1 (13.0-34.1)   | 15.7 (8.3-21.4)  | 8.8 (8.1-11.6)   | 10.0 (3.5-16.9)  | 9.1 (3.4-20.7)    |
| Albumin (g/dL)                         | 4.4 (3.8-4.9)      | 4.1 (2.9-4.6)    | 3.8 (3.5-4.4)    | 3.7 (2.5-4.1)    | 3.5 (1.9-4.4)     |
| Total bilirubin (mg/dl)                | 0.6 (0.4-1.3)      | 0.8 (0.4-1.1)    | 0.8 (0.7-1.5)    | 0.9 (0.6-4.7)    | 0.8 (0.3-16.7)    |
| AST (IU/U)                             | 31 (17-99)         | 51 (12-29)       | 71 (37-206)      | 56 (42-110)      | 46 (21-315)       |
| ALT (IU/L)                             | 35 (17-176)        | 55 (18-116)      | 84 (31-294)      | 47 (21-93)       | 39 (13-160)       |
| Type IV collagen 7s (ng/ml)            | 3.9 (2.3-5)        | 5.7 (4-9.8)      | 7.4 (6.3-8.5)    | 11 (7.6-16.0)    | 8.9 (4.3-225.0)   |
| APRI                                   | 0.50 (0.2-2.0)     | 0.85 (0.4-2.2)   | 2.4 (1.4-5.4)    | 2.2 (1.3-9.5)    | 1.41 (0.6-10.5)   |
| FIB-4 index                            | 1.64 (0.55-2.79)   | 2.62 (1.15-6.42) | 5.59 (5.33-6.69) | 6.59 (3.69-22.0) | 5.73 (2.63-23.45) |
| Histological Activity (0/1/2/3)        | 0/15/3/0           | 0/3/9/0          | 0/0/3/1          | 0/7/7/1          |                   |
| AFP (ng/ml)                            |                    |                  |                  |                  | 17.5 (3-1859)     |
| PIVKA-II (mAU/ml)                      |                    |                  |                  |                  | 33 (8-3560)       |

Data are presented as the median values (range)

BMI, APRI see Table1

### **Supplementary Figure Legends**

#### **Supplementary Figure S1: Type IV collagen 7s, hyaluronic acid, WFA<sup>+</sup>-M2BP, APRI, FIB-4 index in patients with NAFLD with different stages of fibrosis.**

The serum levels of type IV collagen 7s (a), hyaluronic acid (b), and WFA<sup>+</sup>-M2BP (c) APRI (d), and FIB-4 index (e) are shown. \*, p<0.05; \*\*, p<0.001 Kruskal-Wallis test with Dunn's multiple comparison test. The stage of fibrosis was assessed according to Brunt classification.

#### **Supplementary Figure S2: Serum levels of YKL-40 in patients with HCV infection with different stages of fibrosis.**

Serum YKL-40 levels are shown in patients with HCV stratified by the stage of fibrosis (METAVIR classification). \* p<0.05, \*\* p<0.001, by Kruskal-Wallis test with Dunn's multiple comparison test.

HV, healthy volunteers

#### **Supplementary Figure S3: ROC analyses of serum YKL-40, other markers and fibrosis scores for the diagnosis of advanced fibrosis in patients with NAFLD.**

This figure shows ROC curves of YKL-40, type IV collagen 7s, hyaluronic acid, WFA<sup>+</sup>-M2BP, APRI, FIB-4 index, and the prediction model for NAFLD established by YKL-40 and type IV collagen 7s as a diagnostic marker of advanced fibrosis (Stage 3-4 vs. Stage 0-2).

#### **Supplementary Figure S4: Expression and production of YKL-40 from macrophages in vitro.**

Primary macrophages were generated from monocytes obtained from healthy donors as described in Materials and Methods. a: The mRNA levels of YKL-40 in M-CSF-differentiated macrophages were examined on day 5, 6 and 7 of the culture. b: The supernatants were collected from day 7 macrophages stimulated with (conc.) TNF- $\alpha$  and/or (conc.) IL-1 $\beta$ . The YKL-40 levels in the supernatants were assayed by ELISA. \*  $p < 0.05$ , \*\*  $p < 0.001$  by Student t-test.

**Supplementary Figure S5: Serum YKL-40 levels were not correlated with serum TNF $\alpha$  levels and serum IL-1 $\beta$  levels.**

The correlations between serum YKL-40 levels and serum TNF $\alpha$  or IL-1 $\beta$  levels were assessed by Spearman's rank-correlation coefficient. The p-values and correlation coefficients are depicted in each plot.

**Supplementary Figure S6: Serum YKL-40 levels in CHC patients with or without HCC.**

Serum YKL-40 levels in chronic hepatitis and liver cirrhosis patients with or without HCC are shown. \*  $p < 0.05$ , by Kruskal-Wallis test with Dunn's multiple comparison test

# Supplementary Figure S1

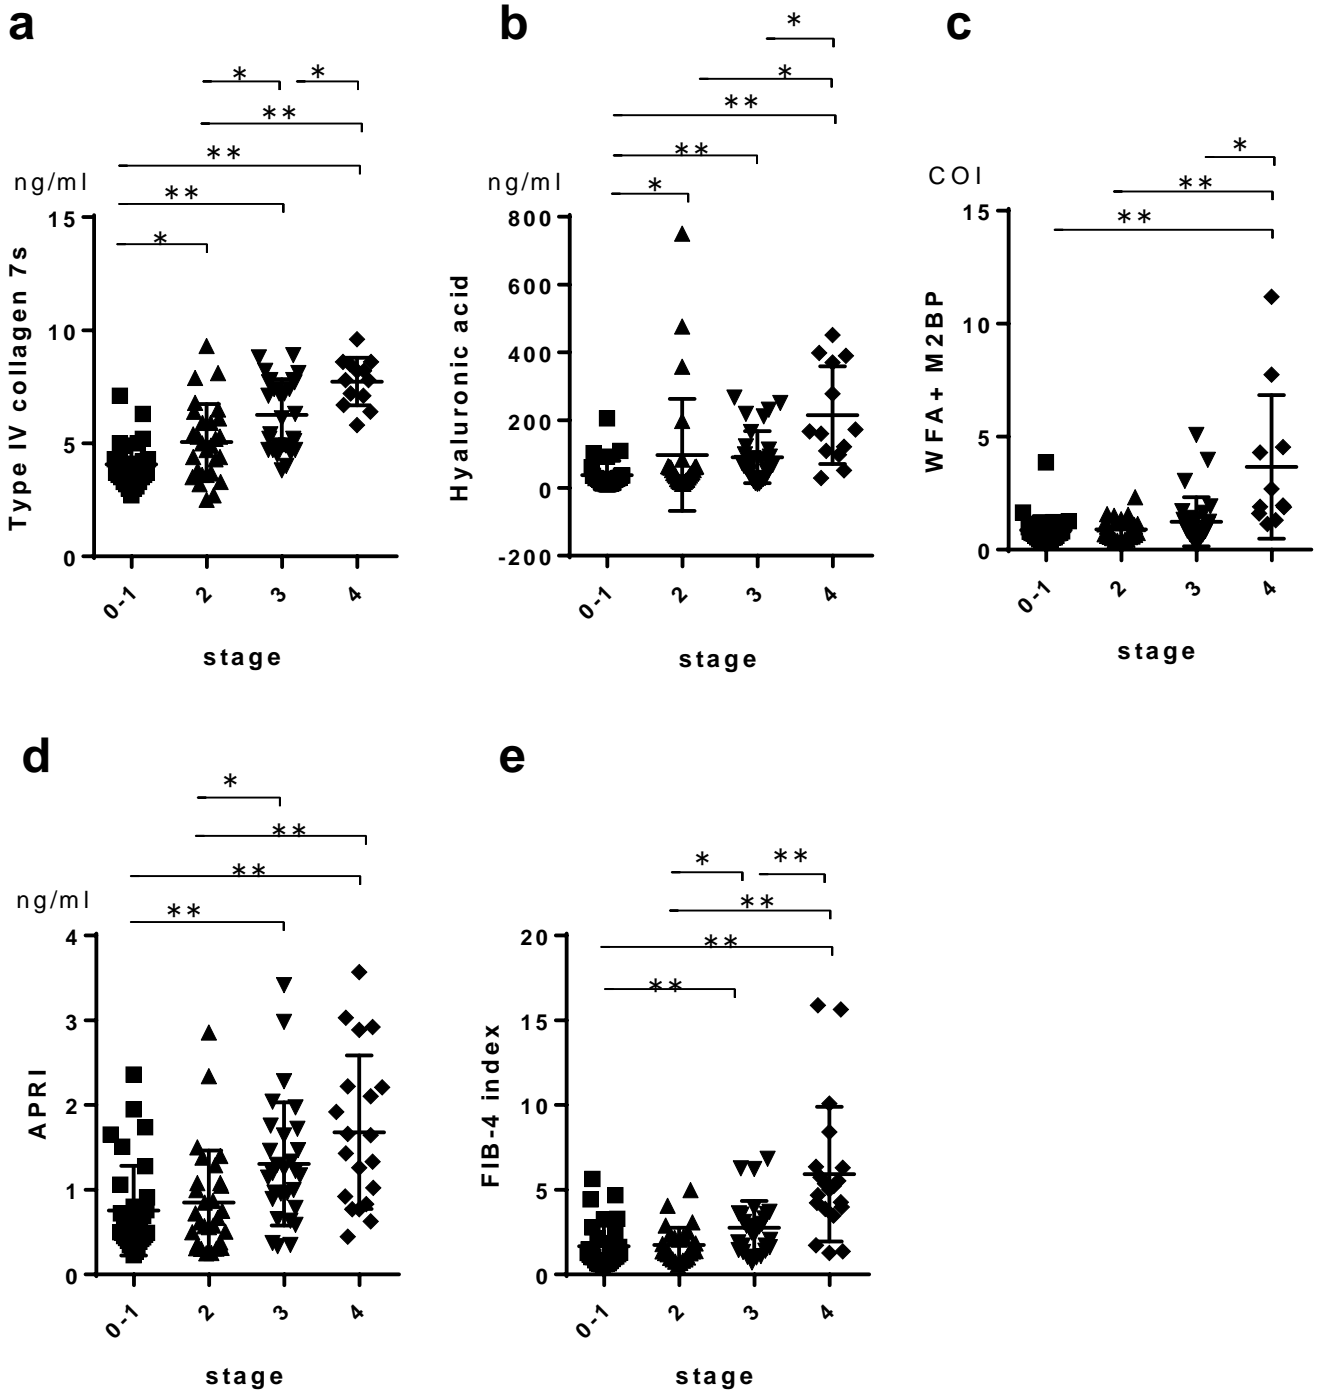

# Supplementary Figure S2

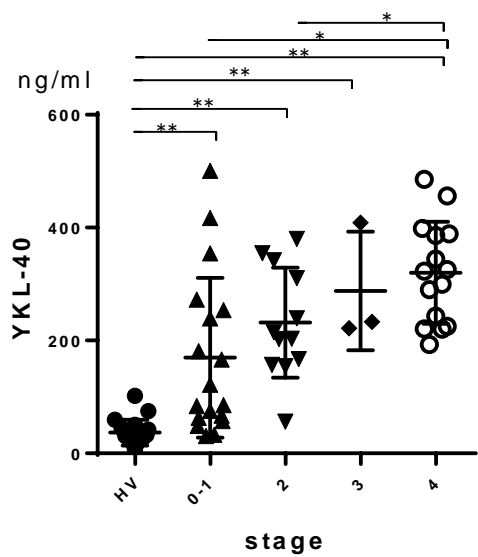



# Supplementary Figure S3

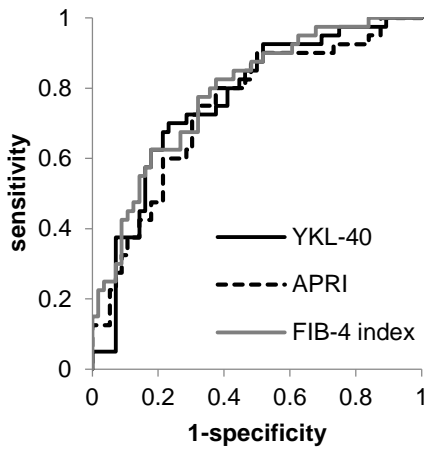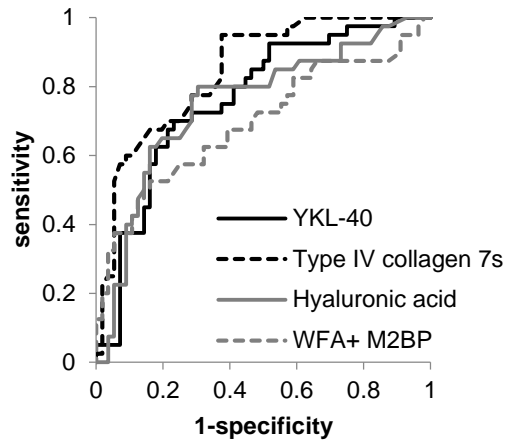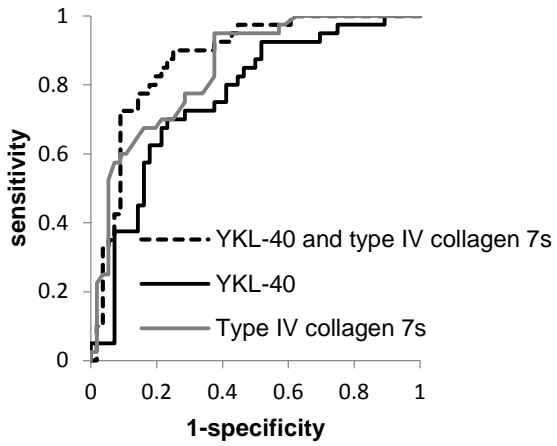

# Supplementary Figure S4

**a**

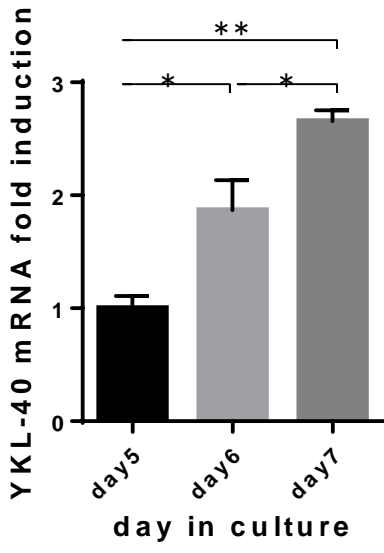

**b**

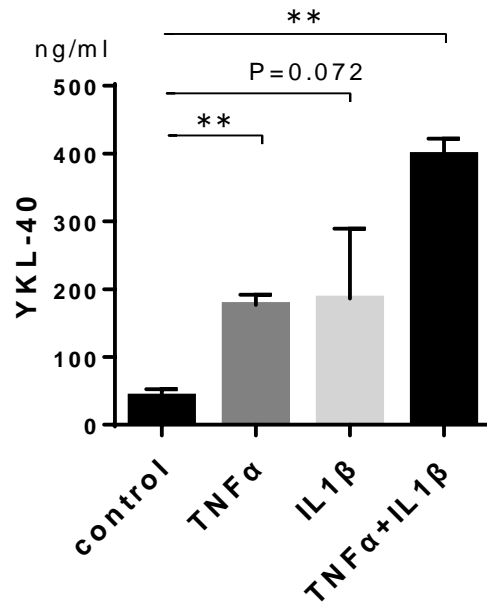

# Supplementary Figure S5

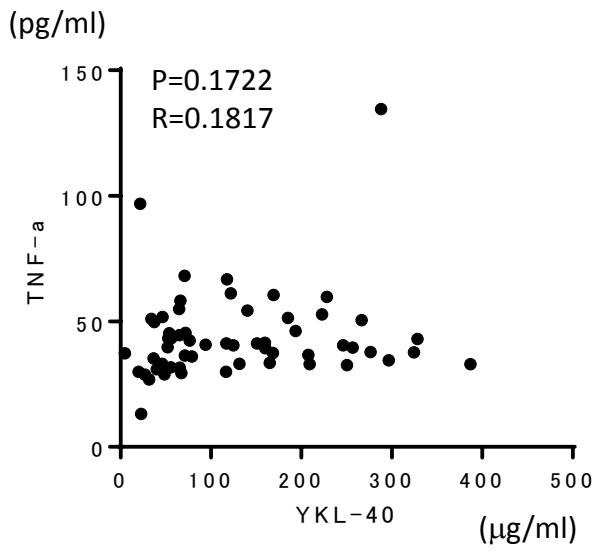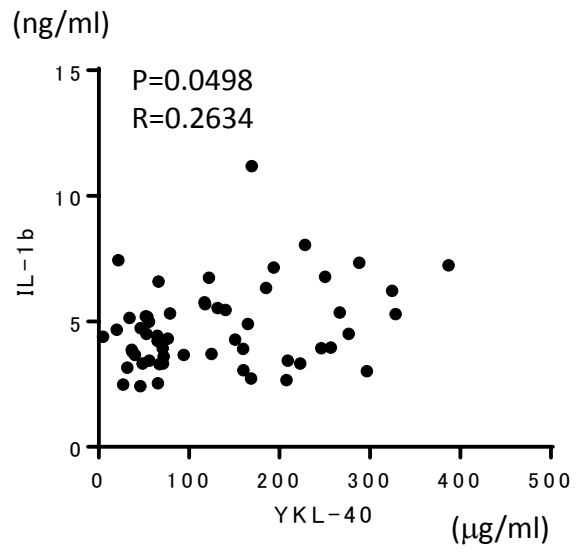

# Supplementary Figure S6

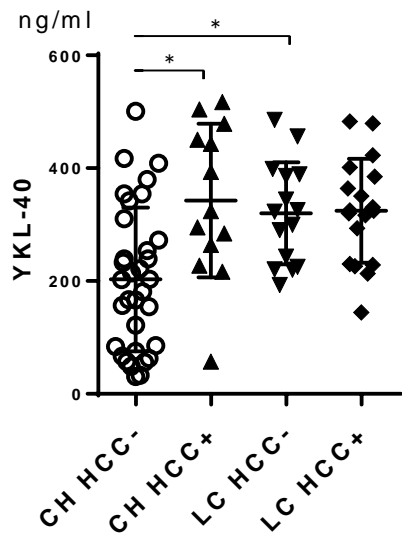

Supplement: srep35282-s1.pdf [file srep35282-s1.pdf]
